# Supplementary material for: Are special read alignment strategies necessary and cost-effective when handling sequencing reads from patient-derived tumor xenografts?
Source: PubMed Central journal article supplement (PMC4326289; doi:10.1186/1471-2164-15-1172), 2014-12-23
Supplement: 12864_2014_6992_MOESM2_ESM.pdf [file 12864_2014_6992_MOESM2_ESM.pdf]

| Table | Alignment method | Coverage              | Target regions    | Human:mouse read depth | Evaluation level               |
|-------|------------------|-----------------------|-------------------|------------------------|--------------------------------|
| S3    | Bowtie2          | hg19:chr14+mm10:chr12 | Exonic+non-exonic | 60x:60x                | Alignment                      |
| S4    | Bowtie2          | Whole hg19+Whole mm10 | Exonic            | 60x:60x                | Alignment                      |
| S5    | Bowtie2          | hg19:chr14+mm10:chr12 | Exonic+non-exonic | 30x:30x                | Alignment                      |
| S6    | Bowtie2          | hg19:chr14+mm10:chr12 | Exonic+non-exonic | 54x:6x                 | Alignment                      |
| S7    | BWA              | hg19:chr14+mm10:chr12 | Exonic+non-exonic | 60x:60x                | Alignment                      |
| S8    | Bowtie2          | Whole hg19+Whole mm10 | Exonic+non-exonic | 60x:60x                | Alignment                      |
| S9    | Bowtie2          | hg19:chr14+mm10:chr12 | Exonic+non-exonic | 60x:60x                | Variant calling (score>13)     |
| S10   | Bowtie2          | hg19:chr14+mm10:chr12 | Exonic+non-exonic | 60x:60x                | Variant calling (all)          |
| S11   | Bowtie2          | Whole hg19+Whole mm10 | Exonic            | 60x:60x                | Variant calling (score>13)     |
| S12   | Bowtie2          | hg19:chr14+mm10:chr12 | Exonic+non-exonic | 30x:30x                | Variant calling (score>13)     |
| S13   | Bowtie2          | hg19:chr14+mm10:chr12 | Exonic+non-exonic | 54x:6x                 | Variant calling (score>13)     |
| S14   | BWA              | hg19:chr14+mm10:chr12 | Exonic+non-exonic | 60x:60x                | Variant calling (score>13)     |
| S15   | Bowtie2          | Whole hg19+Whole mm10 | Exonic+non-exonic | 60x:60x                | Variant calling (score>13)     |
| S16   | Bowtie2          | hg19:chr14+mm10:chr12 | Exonic+non-exonic | 60x:60x                | Non-synonymous SNVs (score>13) |
| S17   | Bowtie2          | Whole hg19+Whole mm10 | Exonic            | 60x:60x                | Non-synonymous SNVs (score>13) |
